# Supplementary material for: Cardiac Corrected QT Interval Changes Among Patients Treated for COVID-19 Infection During the Early Phase of the Pandemic
Source: PubMed Central journal article supplement (PMC8065381; doi:10.1001/jamanetworkopen.2021.6842), 2021-04-23

## Supplemental Online Content

Rubin GA, Desai AD, Chai Z, et al. Cardiac corrected QT interval changes among patients treated for COVID-19 infection during the early phase of the pandemic. *JAMA Netw Open*. 2021;4(4):e216842. doi:10.1001/jamanetworkopen.2021.6842

**eFigure 1.** Flowchart of Patients With and Without COVID-19 Included and Excluded in Analysis

**eMethods.** Supplemental Methods

**eTable 1.** Mean ECGs per Treatment Group According to COVID-19 Status

**eTable 2.** Patients Who Had QTc of 500 Milliseconds or Greater or Change in QTc of Greater Than 60 Milliseconds at Any Time During the 5-Day Treatment Period

**eTable 3.** Baseline Characteristics Comparison of Patients With and Without COVID-19, Subdivided Into Treatment Groups

**eFigure 2.** Trends in QTc Changes Over Time in Patients With COVID-19 Receiving Hydroxychloroquine, Hydroxychloroquine With Azithromycin, Azithromycin alone, or Neither Treatment

**eTable 4.** Modeled QTc by Treatment Group Including Those Treated with Azithromycin

**eFigure 3.** Retrospective Analysis of 56 Patients With COVID-19 With Measured IL-6 Levels and Their QTc Maximum Measurements Over At Least 2 Days

**eFigure 4.** T(p-e)/QT Measurements From 12-Lead ECGs From day 0 Hospitalization of Patients With and Without COVID-19 Not Treated With Hydroxychloroquine or Azithromycin

This supplemental material has been provided by the authors to give readers additional information about their work.

**eFigure 1. Flowchart of Patients With and Without COVID-19 Included and Excluded in Analysis**

Patients were then subdivided into treatment groups according to HCQ+AZ, HCQ, AZ, or no treatment. Patients were excluded from the study if they had <2 ECGs, inadequate ECG quality, or indeterminate COVID-19 testing. AZ = azithromycin; ECG = electrocardiogram; HCQ = hydroxychloroquine.

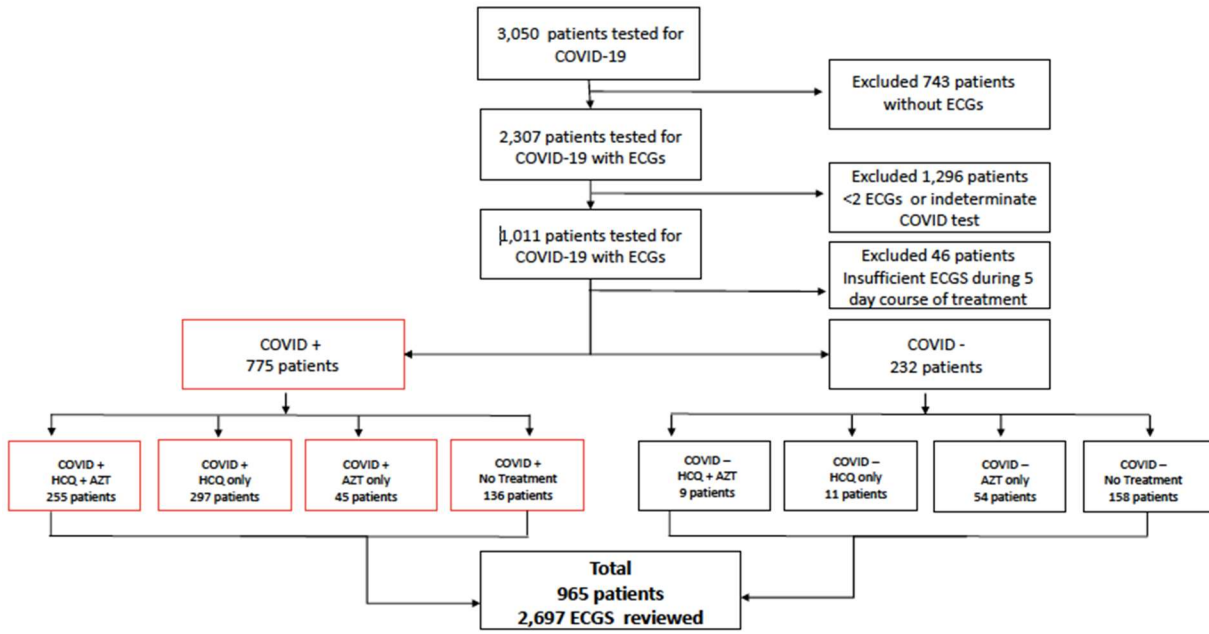

## eMethods. Supplemental Methods

### *Patient selection*

Although the predominant focus of the analysis was to isolate the COVID-19 effect on QTc prolongation, patients with and without COVID-19 were subcategorized into 4 groups by their treatment status: HCQ+AZ, HCQ alone, AZ alone, or no treatment with HCQ nor AZ (**eFigure 1**). The standard regimen of HCQ was 600mg twice on day 1, then 400mg daily on days 2-5. The standard regimen of AZ was 500mg on day 1, then 250mg daily on days 2-5. By April 3rd, treatment with AZ was no longer recommended at our institution and by April 29<sup>th</sup> HCQ was removed from our institutional guidelines.

### *ECG analysis*

Markedly prolonged QTc was defined as  $\geq 500$ ms or an increase of  $>60$ ms<sup>21</sup>. When a notched T wave was unable to be distinguished from a superimposed U wave, the QTc measurement was performed on an alternate lead. In the instance of atrial fibrillation,  $>3$  QTc intervals were measured and averaged. In the instance of a paced or wide QRS, 120ms was subtracted from the QRS complex, and that difference was then subtracted from the measured QT interval using the excess correction method<sup>22</sup>. Programs utilized for measurements included MUSE Cardiology Information System (GE Medical Systems, Menomonee Falls, WI) and the Epic Systems (Verona, WI) electronic medical record.

### *Statistical analysis, multivariable models*

The models included the medication course across the different treatment groups, accounting for the correlation of multiple QTc measures at each patient level. Due to the low number of patients receiving AZ after treatment day 3 since empiric AZ treatment fell out of favor in mid-April 2020, two sets of linear mixed models were fit. Multivariable 2-day model analyzed QTc interval changes between COVID+ and COVID- patients from baseline through day 2 of the treatment course, and multivariable 5-day model included analysis across 5 days of treatment but excluded the AZ only group. Both sets of models included patient COVID-19 status, treatments, days, interactions of treatments with days, and interactions of COVID-19 status with days as the key predictors, where the interactions of days with treatments and COVID-19 status evaluated whether the change in the QTc measurement over time varied across the treatment groups or between patients with and without COVID-19, respectively. The models were further adjusted with covariates such as demographics and comorbidity in large multivariable models. The modeled mean QTc levels together with 95% confidence intervals (CIs) were displayed at each day by treatment groups and by COVID-19 status based on the multivariable models, respectively.

**eTable 1.** Mean ECGs per Treatment Group According to COVID-19 Status  
 Mean number of ECGs for total cohort: 2.79 (95% CI: 2.72-2.87). AZ = azithromycin; CI= confidence interval; ECG = electrocardiogram; HCQ = hydroxychloroquine; n = number of patients.

| <b>COVID -</b>           | <b>n</b> | <b>Mean (95% CI)</b> |
|--------------------------|----------|----------------------|
| <b>HCQ + AZ</b>          | 9        | 2.89 (1.91-3.86)     |
| <b>HCQ</b>               | 11       | 3.00 (2.40-3.60)     |
| <b>AZ</b>                | 54       | 2.28 (2.13-2.42)     |
| <b>Neither treatment</b> | 158      | 2.58 (2.42-2.73)     |

| <b>COVID +</b>           | <b>n</b> | <b>Mean (95% CI)</b> |
|--------------------------|----------|----------------------|
| <b>HCQ + AZ</b>          | 255      | 3.05 (2.90-3.21)     |
| <b>HCQ</b>               | 297      | 2.96 (2.82-3.09)     |
| <b>AZ</b>                | 45       | 2.47 (2.14-2.80)     |
| <b>Neither treatment</b> | 136      | 2.50 (2.32-2.68)     |

**eTable 2.** Patients Who Had QTc of 500 Milliseconds or Greater or Change in QTc of Greater Than 60 Milliseconds at Any Time During the 5-Day Treatment Period  
 AZ = azithromycin; HCQ = hydroxychloroquine; n = number of patients.

| Treatment    | COVID status | n   | QTc 500 ms |                                          | >60 ms increase in QTc |                                          |
|--------------|--------------|-----|------------|------------------------------------------|------------------------|------------------------------------------|
|              |              |     | n (%)      | p-value (Adjusted p-value <sup>†</sup> ) | n (%)                  | p-value (Adjusted p-value <sup>†</sup> ) |
| HCQ + AZ     | COVID-       | 9   | 0 (0.0%)   | 1.000                                    | 1 (11.1%)              | 1.000                                    |
|              | COVID+       | 255 | 19 (7.5%)  | (1.000)                                  | 32 (12.5%)             | (1.000)                                  |
| HCQ          | COVID-       | 11  | 1 (9.1%)   | 0.490                                    | 1 (9.1%)               | 1.000                                    |
|              | COVID+       | 297 | 17 (5.7%)  | (1.000)                                  | 28 (9.4%)              | (1.000)                                  |
| AZ           | COVID-       | 54  | 6 (11.1%)  | 0.109                                    | 5 (9.3%)               | 0.094                                    |
|              | COVID+       | 45  | 11 (24.4%) | (0.436)                                  | 10 (22.2%)             | (0.282)                                  |
| No treatment | COVID-       | 158 | 17 (10.8%) | <b>0.002</b>                             | 10 (6.3%)              | 0.818                                    |
|              | COVID+       | 136 | 34 (25.0%) | <b>(0.008)</b>                           | 10 (7.4%)              | (1.000)                                  |

<sup>†</sup>The adjusted p-values using Bonferroni corrections for multiple comparisons across four treatment groups.

**eTable 3.** Baseline Characteristics Comparison of Patients With and Without COVID-19, Subdivided Into Treatment Groups

Data is presented as # of patients (% of patients). GFR = glomerular filtrate rate, BMI= body mass index, Hs-troponin= high sensitivity troponin, CRP= C-reactive protein, LDH= lactate dehydrogenase

**3A. Patients with COVID-19**

| <b>Total n=733</b>                          | <b>HCQ + AZ<br/>n=255</b> | <b>HCQ<br/>n=297</b> | <b>AZ<br/>n=45</b> | <b>Neither<br/>treatment<br/>n=136</b> | <b>p-value</b>               |
|---------------------------------------------|---------------------------|----------------------|--------------------|----------------------------------------|------------------------------|
| <b>Age, years</b>                           |                           |                      |                    |                                        | 0.476 <sup>1</sup>           |
| <50                                         | 46 (18.0%)                | 42 (14.1%)           | 11 (24.4%)         | 20 (14.7%)                             |                              |
| 50-59                                       | 43 (16.9%)                | 47 (15.8%)           | 5 (11.1%)          | 23 (16.9%)                             |                              |
| 60-69                                       | 73 (28.6%)                | 73 (24.6%)           | 12 (26.7%)         | 28 (20.6%)                             |                              |
| 70-79                                       | 52 (20.4%)                | 71 (23.9%)           | 9 (20.0%)          | 31 (22.8%)                             |                              |
| ≥80                                         | 41 (16.1%)                | 64 (21.5%)           | 8 (17.8%)          | 34 (25.0%)                             |                              |
| <b>Gender</b>                               |                           |                      |                    |                                        | 0.493 <sup>1</sup>           |
| Female                                      | 101 (39.6%)               | 133<br>(44.8%)       | 16 (35.6%)         | 55 (40.4%)                             |                              |
| Male                                        | 154 (60.4%)               | 164<br>(55.2%)       | 29 (64.4%)         | 81 (59.6%)                             |                              |
| <b>Race</b>                                 |                           |                      |                    |                                        | 0.082 <sup>1</sup>           |
| Black                                       | 59 (30.9%)                | 48 (20.4%)           | 7 (20.6%)          | 34 (31.5%)                             |                              |
| White                                       | 53 (27.7%)                | 84 (35.7%)           | 15 (44.1%)         | 36 (33.3%)                             |                              |
| Other                                       | 79 (41.4%)                | 103<br>(43.8%)       | 12 (35.3%)         | 38 (35.2%)                             |                              |
| Not available                               | 64                        | 62                   | 11                 | 28                                     |                              |
| <b>Ethnicity</b>                            |                           |                      |                    |                                        | <b>0.044<sup>1</sup></b>     |
| Hispanic/Latino                             | 124 (65.6%)               | 160<br>(70.8%)       | 32 (80.0%)         | 64 (58.7%)                             |                              |
| Not Hispanic/Latino                         | 65 (34.4%)                | 66 (29.2%)           | 8 (20.0%)          | 45 (41.3%)                             |                              |
| Not available                               | 66                        | 71                   | 5                  | 27                                     |                              |
| <b>GFR Stage (ml/min/1.73m<sup>2</sup>)</b> |                           |                      |                    |                                        | <b>&lt;0.001<sup>2</sup></b> |
| Normal (≥90)                                | 48 (18.8%)                | 74 (24.9%)           | 10 (22.7%)         | 17 (12.7%)                             |                              |
| Mild (60-89)                                | 86 (33.7%)                | 88 (29.6%)           | 14 (31.8%)         | 38 (28.4%)                             |                              |
| Moderate (30-59)                            | 74 (29.0%)                | 85 (28.6%)           | 14 (31.8%)         | 39 (29.1%)                             |                              |
| Severe (15-29)                              | 25 (9.8%)                 | 24 (8.1%)            | 3 (6.8%)           | 14 (10.4%)                             |                              |
| Failure (<15)                               | 22 (8.6%)                 | 26 (8.8%)            | 3 (6.8%)           | 26 (19.4%)                             |                              |
| Not available                               | 0                         | 0                    | 1                  | 2                                      |                              |
| <b>BMI (kg/m<sup>2</sup>)</b>               |                           |                      |                    |                                        | 0.102 <sup>2</sup>           |
| Underweight (<18.5)                         | 1 (0.4%)                  | 7 (2.5%)             | 2 (4.8%)           | 4 (3.1%)                               |                              |
| Normal Weight (18.5-24.9)                   | 54 (22.0%)                | 64 (22.6%)           | 4 (9.5%)           | 32 (25.2%)                             |                              |
| Overweight (25-29.9)                        | 80 (32.5%)                | 92 (32.5%)           | 20 (47.6%)         | 49 (38.6%)                             |                              |
| Obese (30-35)                               | 62 (25.2%)                | 61 (21.6%)           | 8 (19.0%)          | 27 (21.3%)                             |                              |
| Morbidly obese (>35)                        | 49 (19.9%)                | 59 (20.8%)           | 8 (19.0%)          | 15 (11.8%)                             |                              |
| Not available                               | 9                         | 14                   | 3                  | 9                                      |                              |
| <b>QT prolonging medication</b>             | 87 (34.1%)                | 101<br>(34.0%)       | 10 (22.2%)         | 68 (50.0%)                             | <b>0.001<sup>3</sup></b>     |

|                                    |                       |                       |                      |                      |                               |
|------------------------------------|-----------------------|-----------------------|----------------------|----------------------|-------------------------------|
| <b>Hypertension</b>                | 106 (41.6%)           | 145 (48.8%)           | 22 (48.9%)           | 67 (49.3%)           | 0.301 <sup>1</sup>            |
| <b>Diabetes</b>                    | 82 (32.2%)            | 98 (33.0%)            | 10 (22.2%)           | 43 (31.6%)           | 0.548 <sup>1</sup>            |
| <b>Hs-Troponin*</b> median (range) | 32.0 (6.0-2784.0)     | 24.0 (6.0-2107.0)     | 27.0 (6.0-544.0)     | 63.0 (6.0-3563.0)    | <b>0.043</b> <sup>3</sup>     |
| <b>CRP*</b> median (range)         | 219.0 (0.9-457.7)     | 196.6 (12.3-503.5)    | 150.6 (3.1-300.0)    | 135.4 (0.9-300.0)    | <b>&lt;0.001</b> <sup>3</sup> |
| <b>Ferritin*</b> median (range)    | 1090.0 (49.1-53315.0) | 1082.0 (25.1-49960.0) | 820.7(32.1-11555.0)  | 986.4 (22.6-30518.0) | .152 <sup>3</sup>             |
| <b>LDH*</b> median (range)         | 539.5 (113.0-5336.0)  | 512.5 (176.0-5000.0)  | 451.0 (157.0-1551.0) | 480.5 (154.0-3922.0) | <b>0.047</b> <sup>3</sup>     |

<sup>1</sup>Pearson's Chi-squared test <sup>2</sup>Trend test for ordinal variables <sup>3</sup>Linear Model ANOVA

**eTable 3B. Patients without COVID-19.**

Data is presented as # of patients (% of patients). GFR = glomerular filtrate rate, BMI= body mass index, Hs-troponin= high sensitivity troponin, CRP= C-reactive protein, LDH= lactate dehydrogenase

| <b>Total n=232</b> | <b>HCQ + AZ<br/>n=9</b> | <b>HCQ<br/>n=11</b> | <b>AZ<br/>n=54</b> | <b>Neither treatment<br/>n=158</b> | <b>p-value</b>     |
|--------------------|-------------------------|---------------------|--------------------|------------------------------------|--------------------|
| <b>Age, years</b>  |                         |                     |                    |                                    | 0.720 <sup>1</sup> |
| <50                | 3 (33.3%)               | 3 (27.3%)           | 8 (14.8%)          | 36 (22.8%)                         |                    |
| 50-59              | 2 (22.2%)               | 2 (18.2%)           | 9 (16.7%)          | 26 (16.5%)                         |                    |
| 60-69              | 3 (33.3%)               | 1 (9.1%)            | 11 (20.4%)         | 33 (20.9%)                         |                    |
| 70-79              | 1 (11.1%)               | 4 (36.4%)           | 15 (27.8%)         | 31 (19.6%)                         |                    |
| ≥80                | 0 (0.0%)                | 1 (9.1%)            | 11 (20.4%)         | 32 (20.3%)                         |                    |
| <b>Gender</b>      |                         |                     |                    |                                    | 0.528 <sup>1</sup> |
| Female             | 2 (22.2%)               | 5 (45.5%)           | 21 (38.9%)         | 71 (44.9%)                         |                    |
| Male               | 7 (77.8%)               | 6 (54.5%)           | 33 (61.1%)         | 87 (55.1%)                         |                    |
| <b>Race</b>        |                         |                     |                    |                                    | 0.168 <sup>1</sup> |
| Black              | 0 (0.0%)                | 4 (44.4%)           | 14 (30.4%)         | 32 (24.8%)                         |                    |
| White              | 3 (100.0%)              | 1 (11.1%)           | 15 (32.6%)         | 54 (41.9%)                         |                    |
| Other              | 0 (0.0%)                | 4 (44.4%)           | 17 (37.0%)         | 43 (33.3%)                         |                    |

|                                             |                       |                     |                      |                      |                    |
|---------------------------------------------|-----------------------|---------------------|----------------------|----------------------|--------------------|
| Not Available                               | 6                     | 2                   | 8                    | 29                   |                    |
| <b>Ethnicity</b>                            |                       |                     |                      |                      | 0.252 <sup>1</sup> |
| Hispanic/Latino                             | 4 (80.0%)             | 3 (33.3%)           | 20 (50.0%)           | 47<br>(40.9%)        |                    |
| Not Hispanic/Latino                         | 1 (20.0%)             | 6 (66.7%)           | 20 (50.0%)           | 68<br>(59.1%)        |                    |
| Not Available                               | 4                     | 2                   | 14                   | 43                   |                    |
| <b>GFR Stage (ml/min/1.73m<sup>2</sup>)</b> |                       |                     |                      |                      | 0.218 <sup>2</sup> |
| Normal (≥90)                                | 2 (22.2%)             | 3 (27.3%)           | 12 (22.2%)           | 41<br>(27.2%)        |                    |
| Mild (60-89)                                | 6 (66.7%)             | 6 (54.5%)           | 12 (22.2%)           | 33<br>(21.9%)        |                    |
| Moderate (30-59)                            | 1 (11.1%)             | 0 (0.0%)            | 13 (24.1%)           | 39<br>(25.8%)        |                    |
| Severe (15-29)                              | 0 (0.0%)              | 1 (9.1%)            | 12 (22.2%)           | 20<br>(13.2%)        |                    |
| Failure (<15)                               | 0 (0.0%)              | 1 (9.1%)            | 5 (9.3%)             | 18<br>(11.9%)        |                    |
| Not Available                               | 0                     | 0                   | 0                    | 7                    |                    |
| <b>BMI (kg/m<sup>2</sup>)</b>               |                       |                     |                      |                      | 0.341 <sup>2</sup> |
| Underweight (<18.5)                         | 0 (0.0%)              | 1 (9.1%)            | 6 (12.0%)            | 7 (4.9%)             |                    |
| Normal Weight (18.5-24.9)                   | 1 (16.7%)             | 3 (27.3%)           | 18 (36.0%)           | 45<br>(31.2%)        |                    |
| Overweight (25-29.9)                        | 2 (33.3%)             | 3 (27.3%)           | 9 (18.0%)            | 39<br>(27.1%)        |                    |
| Obese (30-35)                               | 0 (0.0%)              | 2 (18.2%)           | 8 (16.0%)            | 27<br>(18.8%)        |                    |
| Morbidly obese (>35)                        | 3 (50.0%)             | 2 (18.2%)           | 9 (18.0%)            | 26<br>(18.1%)        |                    |
| Not Available                               | 3                     | 0                   | 4                    | 14                   |                    |
| <b>QT prolonging medication</b>             | 2 (22.2%)             | 4 (36.4%)           | 30 (55.6%)           | 91<br>(57.6%)        | 0.118 <sup>3</sup> |
| <b>Hypertension</b>                         | 5 (55.6%)             | 5 (45.5%)           | 32 (59.3%)           | 87<br>(55.1%)        | 0.857 <sup>1</sup> |
| <b>Diabetes</b>                             | 1 (11.1%)             | 1 (9.1%)            | 19 (35.2%)           | 56<br>(35.4%)        | 0.150 <sup>1</sup> |
| <b>Hs-Troponin*</b> median (range)          | 12.0 (6.0-16.0)       | 12.0 (6.0-184.0)    | 50.0 (6.0-13447.0)   | 47.0 (6.0-44612.0)   | 0.930 <sup>3</sup> |
| <b>CRP*</b> median (range)                  | 153.1 (47.9-300.0)    | 205.6 (3.8-293.6)   | 121.3 (1.4-300.0)    | 69.0 (0.3-300.0)     | 0.132 <sup>3</sup> |
| <b>Ferritin*</b> median (range)             | 1332.0 (269.7-2980.0) | 429.8 (44.8-4812.0) | 266.5 (8.8-4655.0)   | 494.1 (10.3-8863.0)  | 0.753 <sup>3</sup> |
| <b>LDH*</b> median (range)                  | 458.0 (332.0-834.0)   | 513.5 (281.0-832.0) | 357.0 (125.0-3267.0) | 357.0 (117.0-5000.0) | 0.957 <sup>3</sup> |

<sup>1</sup>Pearson's Chi-squared test <sup>2</sup>Trend test for ordinal variables <sup>3</sup>Linear Model ANOVA.



**eFigure 2.** Trends in QTc Changes Over Time in Patients With COVID-19 Receiving Hydroxychloroquine, Hydroxychloroquine With Azithromycin, Azithromycin Alone, or Neither Treatment

Figure 2A shows unadjusted QTc values and Figure 2B shows modeled QTc values. AZ = azithromycin; HCQ = hydroxychloroquine.

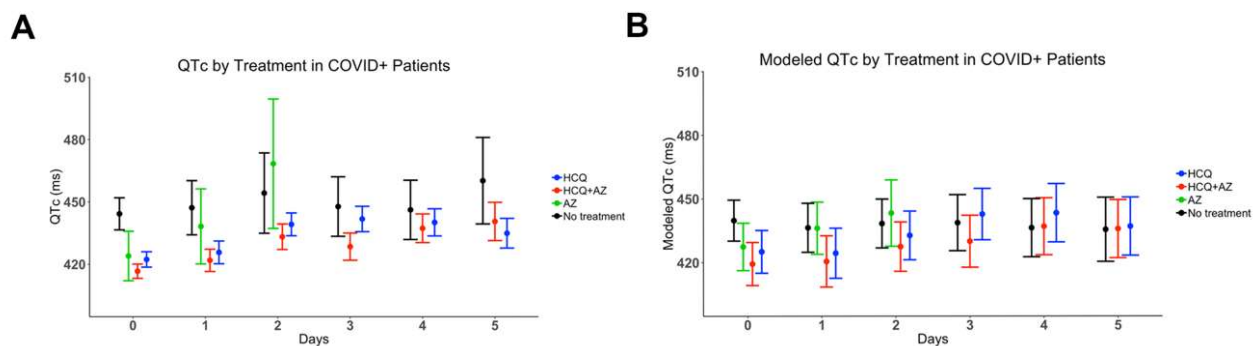

**eTable 4. Modeled QTc by Treatment Group Including Those Treated with Azithromycin**

**A. Modeled QTc by treatment group from day 0 through day 2 including those treated with AZ. Includes patients with and without COVID-19.**

| QTc [ms] (95% CI)        | Day 0                  | Day 1                  | Day 2                    | p value* |
|--------------------------|------------------------|------------------------|--------------------------|----------|
| <b>Neither treatment</b> | 438.86 (429.54-448.17) | 437.69 (426.52-448.87) | 438.29 (426.78-449.80)   | 0.905    |
| <b>HCQ+AZ</b>            | 419.1 (409.45-428.76)  | 422.17 (410.79-433.56) | 430.14 (418.78-441.50)   | 0.013    |
| <b>HCQ</b>               | 425.46 (416.01-434.9)  | 426.34 (415.42-437.26) | 434.12 (423.07-445.17)   | 0.042    |
| <b>AZ</b>                | 427.41 (416.25-438.58) | 436.19 (423.88-448.51) | 443.30 (427.67 – 458.93) | 0.025    |

**B. Modeled QTc by treatment group from day 0 through day 5 not including those treated with AZ. Includes patients with and without COVID-19.**

| QT in ms (95% CI)        | Day 0                     | Day 1                     | Day 2                     | Day 3                     | Day 4                     | Day 5                     | p value* |
|--------------------------|---------------------------|---------------------------|---------------------------|---------------------------|---------------------------|---------------------------|----------|
| <b>Neither treatment</b> | 439.80<br>(430.16-449.45) | 436.40<br>(424.85-447.95) | 438.39<br>(426.88-449.91) | 438.74<br>(425.54-451.95) | 436.35<br>(422.67-450.04) | 435.56<br>(420.45-450.68) | 0.526    |
| <b>HCQ+AZ</b>            | 419.33<br>(409.20-429.47) | 420.54<br>(408.48-432.60) | 427.50<br>(415.89-439.11) | 430.00<br>(417.76-442.24) | 437.02<br>(423.59-450.45) | 435.90<br>(422.21-449.59) | 0.004    |
| <b>HCQ</b>               | 425.09<br>(415.02-435.15) | 424.41<br>(412.62-436.19) | 432.77<br>(421.30-444.23) | 442.78<br>(430.69-454.88) | 443.39<br>(429.65-457.12) | 437.06<br>(423.35-450.77) | 0.037    |

Data presented as average QTc in ms with 95% confidence intervals. \*P values represent modeled change in QTc interval from Day 0 to Day 5. AZ = azithromycin; HCQ = hydroxychloroquine.

**eFigure 3.** Retrospective Analysis of 56 Patients With COVID-19 With Measured IL-6 Levels and Their QTc Maximum Measurements Over At Least 2 Days

$R^2$  is 0.1295

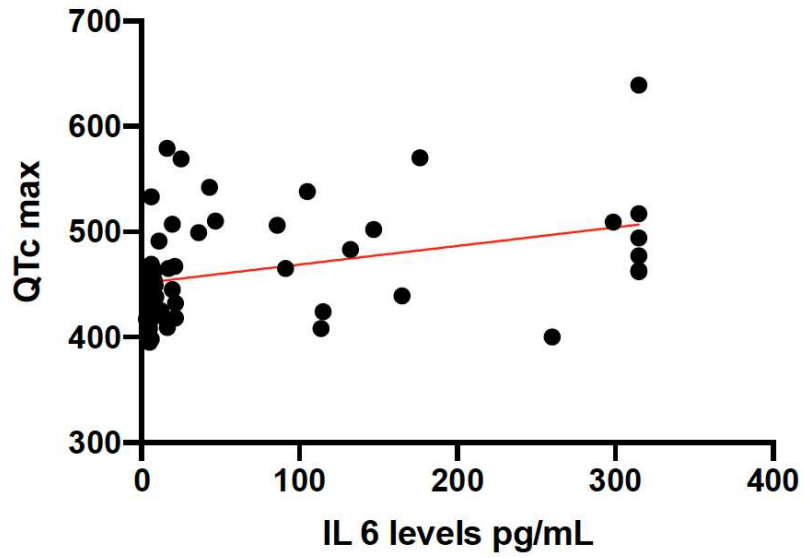

**eFigure 4.** T(p-e)/QT Measurements From 12-Lead ECGs From day 0 Hospitalization of Patients With and Without COVID-19 Not Treated With Hydroxychloroquine or Azithromycin

(avg  $\pm$  st. dev,  $0.26 \pm 0.11$  vs  $0.34 \pm 0.14$ , unpaired t-test p value of 0.0038). We analyzed 50 patients from each group. AZ = azithromycin; HCQ = hydroxychloroquine.

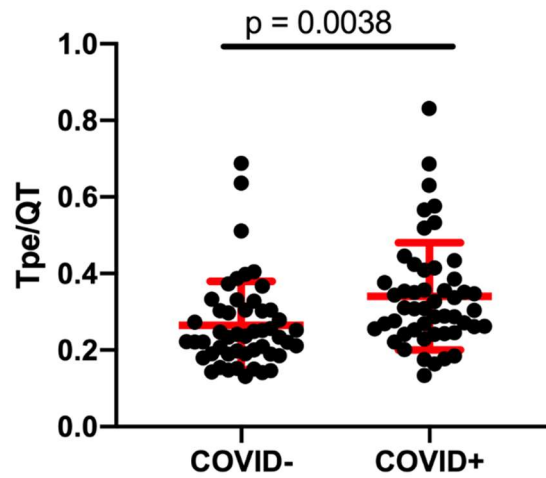

Supplement: jamanetwopen-e216842-s001.pdf [file jamanetwopen-e216842-s001.pdf]
